# Supplementary material for: 1,3-Bis(3,4,5-trifluoro-2,6-dinitrophenyl)urea (ZXC-19): a multifluorine substituted propellant with superior detonation performance
Source: Royal Society of Chemistry journal article supplement (doi:10.1039/c9nj01885a), 2019-01-01
Supplement: c9nj01885a1.pdf [file c9nj01885a1.pdf]

## SUPPORTING INFORMATION

---

# Supporting Information

## 1,3-bis(3,4,5-trifluoro-2,6-dinitrophenyl)urea (ZXC-19): A Multifluorine Explosive with Superior Performance

Xingcheng Zhang,<sup>\*a</sup> Menglei Fu,<sup>b</sup> Fangfang Zou,<sup>c</sup> Jingyuan Hao,<sup>c</sup> Youle Qu,<sup>b</sup> Wenxiang Hu<sup>c</sup>, Qiuju, Zhou<sup>a</sup>

## SUPPORTING INFORMATION

**Table S1: Crystallographic data and structure refinement details for 1,3-bis(3,4,5-trifluoro-2,6-dinitrophenyl)urea (ZXC-19)**

| CCDC                                                                               | Deposition Number |                                 | 1877092            |
|------------------------------------------------------------------------------------|-------------------|---------------------------------|--------------------|
| Bond precision:                                                                    | C-C = 0.0028 Å    |                                 | Wavelength=0.71073 |
| Cell:                                                                              | a=12.2579(5)      | b=9.7269(4)                     | c=29.1802(12)      |
|                                                                                    | alpha=90          | beta=92.889(4)                  | gamma=90           |
| Temperature: 173 K                                                                 |                   |                                 |                    |
|                                                                                    | Calculated        | Reported                        |                    |
| Volume                                                                             | 3474.8(2)         | 3474.8(2)                       |                    |
| Space group                                                                        | P 21/n            | P 21/n                          |                    |
| Hall group                                                                         | : -P 2yn          | -P 2yn                          |                    |
| Moiety formula                                                                     | C13 H2 F6 N6 O9   | C13 H2 F6 N6 O9                 |                    |
| Sum formula                                                                        | C13 H2 F6 N6 O9   | C13 H2 F6 N6 O9                 |                    |
| Mr                                                                                 | 500.21            | 500.21                          |                    |
| Dx, g cm <sup>-3</sup>                                                             | 1.912             | 1.912                           |                    |
| Z                                                                                  | 8                 | 8                               |                    |
| Mu (mm <sup>-1</sup> )                                                             | 0.200             | 0.200                           |                    |
| F000                                                                               | 1984.0            | 1984.0                          |                    |
| F000'                                                                              | 1985.80           |                                 |                    |
| h,k,lmax                                                                           | 15,12,37          | 15,12,37                        |                    |
| Nref                                                                               | 7593              | 7524                            |                    |
| Tmin,Tmax                                                                          | 0.959,0.984       | 0.781,1.000                     |                    |
| Tmin'                                                                              | 0.959             |                                 |                    |
| Correction method= # Reported T Limits: Tmin=0.781 Tmax=1.000 AbsCorr = MULTI-SCAN |                   |                                 |                    |
| Data completeness=                                                                 | 0.991             | Theta(max)= 26.997              |                    |
| R(reflections)=                                                                    | 0.0394( 5455)     | wR2(reflections)= 0.1052( 7524) |                    |
| S =                                                                                | 1.068             | Npar= 644                       |                    |

## SUPPORTING INFORMATION

---

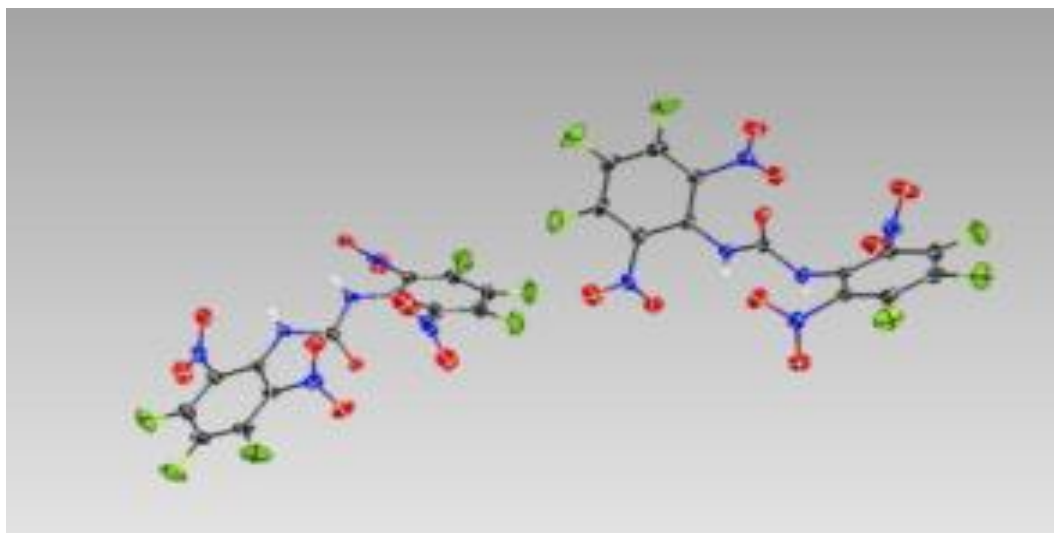

Figure 1 Single-crystal X-ray structure of ZXC-19

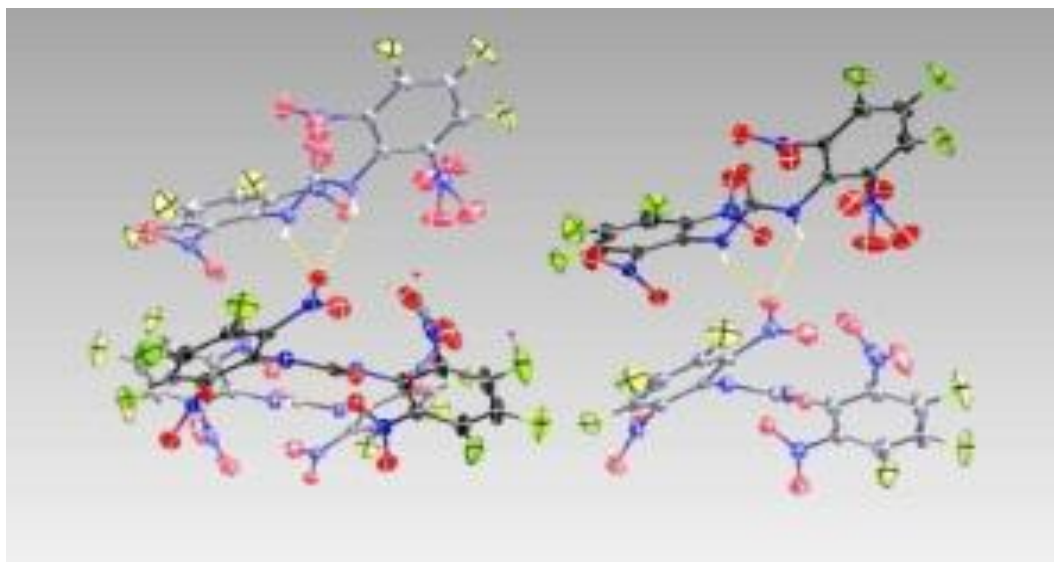

Figure 2 Expand all contacts X-ray structure of ZXC-19

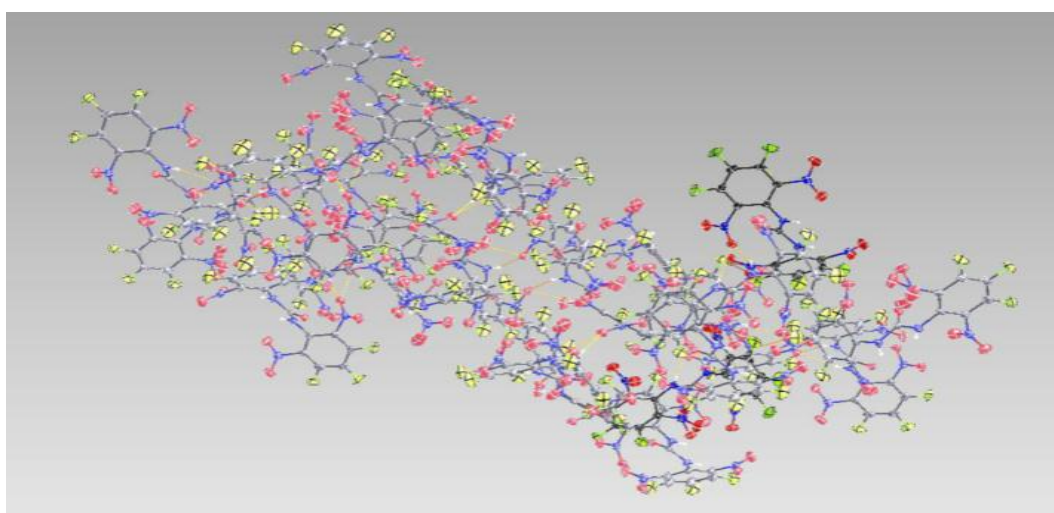

Figure 3 Crystal packing of ZXC-19

## SUPPORTING INFORMATION

**Table 2. Atomic parameters**

| Atom | Ox. | Wyck. | Site | S.O.F. | x/a      | y/b     | z/c      | U [Å <sup>2</sup> ] |
|------|-----|-------|------|--------|----------|---------|----------|---------------------|
| C1A  |     | 4e    | 1    |        | 0.95132  | 1.00289 | 0.11868  |                     |
| C2A  |     | 4e    | 1    |        | 1.29502  | 1.09610 | 0.19623  |                     |
| C3A  |     | 4e    | 1    |        | 1.26533  | 1.04765 | 0.23769  |                     |
| C4A  |     | 4e    | 1    |        | 1.16983  | 0.97496 | 0.24038  |                     |
| C5A  |     | 4e    | 1    |        | 1.10310  | 0.95124 | 0.20155  |                     |
| C6A  |     | 4e    | 1    |        | 1.12965  | 1.00202 | 0.15859  |                     |
| C7A  |     | 4e    | 1    |        | 1.22772  | 1.07577 | 0.15721  |                     |
| C8A  |     | 4e    | 1    |        | 0.64148  | 1.10983 | 0.02097  |                     |
| C9A  |     | 4e    | 1    |        | 0.56769  | 1.07183 | 0.05230  |                     |
| C10A |     | 4e    | 1    |        | 0.60186  | 0.99862 | 0.09008  |                     |
| C11A |     | 4e    | 1    |        | 0.71075  | 0.96379 | 0.09773  |                     |
| C12A |     | 4e    | 1    |        | 0.78943  | 1.00438 | 0.06734  |                     |
| C13A |     | 4e    | 1    |        | 0.75113  | 1.07670 | 0.02826  |                     |
| C1B  |     | 4e    | 1    |        | 0.34748  | 0.52762 | 0.06255  |                     |
| C2B  |     | 4e    | 1    |        | 0.32182  | 0.44450 | 0.02571  |                     |
| C3B  |     | 4e    | 1    |        | 0.21913  | 0.38979 | 0.01993  |                     |
| C4B  |     | 4e    | 1    |        | 0.14049  | 0.41968 | 0.05070  |                     |
| C5B  |     | 4e    | 1    |        | 0.16371  | 0.50240 | 0.08899  |                     |
| C6B  |     | 4e    | 1    |        | 0.26944  | 0.55639 | 0.09402  |                     |
| C7B  |     | 4e    | 1    |        | 0.02764  | 0.41796 | 0.13911  |                     |
| C8B  |     | 4e    | 1    |        | -0.15055 | 0.20174 | 0.25036  |                     |
| C9B  |     | 4e    | 1    |        | -0.25362 | 0.17434 | 0.23190  |                     |
| C10B |     | 4e    | 1    |        | -0.28871 | 0.23651 | 0.19147  |                     |
| C11B |     | 4e    | 1    |        | -0.22154 | 0.32696 | 0.16972  |                     |
| C12B |     | 4e    | 1    |        | -0.11768 | 0.35890 | 0.18822  |                     |
| C13B |     | 4e    | 1    |        | -0.08425 | 0.29291 | 0.22862  |                     |
| F1A  |     | 4e    | 1    |        | 1.39065  | 1.15947 | 0.19419  |                     |
| F2A  |     | 4e    | 1    |        | 1.33002  | 1.06842 | 0.27537  |                     |
| F3A  |     | 4e    | 1    |        | 1.14653  | 0.92189 | 0.28053  |                     |
| F4A  |     | 4e    | 1    |        | 0.60450  | 1.17596 | -0.01661 |                     |
| F5A  |     | 4e    | 1    |        | 0.46186  | 1.10370 | 0.04471  |                     |
| F6A  |     | 4e    | 1    |        | 0.52661  | 0.95601 | 0.11829  |                     |
| F1B  |     | 4e    | 1    |        | 0.44721  | 0.58106 | 0.06751  |                     |
| F2B  |     | 4e    | 1    |        | 0.39695  | 0.41650 | -0.00468 |                     |
| F3B  |     | 4e    | 1    |        | 0.19593  | 0.31155 | -0.01676 |                     |
| F4B  |     | 4e    | 1    |        | -0.11554 | 0.14065 | 0.28915  |                     |
| F5B  |     | 4e    | 1    |        | -0.31902 | 0.08882 | 0.25325  |                     |
| F6B  |     | 4e    | 1    |        | -0.38894 | 0.20978 | 0.17383  |                     |

## SUPPORTING INFORMATION

|      |  |    |   |  |          |         |          |         |
|------|--|----|---|--|----------|---------|----------|---------|
| N1A  |  | 4e | 1 |  | 1.06259  | 0.98028 | 0.11924  |         |
| H1AA |  | 4e | 1 |  | 1.09039  | 0.97550 | 0.09501  | -1.2000 |
| N2A  |  | 4e | 1 |  | 0.90054  | 0.97890 | 0.07596  |         |
| H2AA |  | 4e | 1 |  | 0.93751  | 0.96985 | 0.05363  | -1.2000 |
| N3A  |  | 4e | 1 |  | 1.01017  | 0.85804 | 0.20690  |         |
| N4A  |  | 4e | 1 |  | 1.26226  | 1.13595 | 0.11458  |         |
| N5A  |  | 4e | 1 |  | 0.73804  | 0.87399 | 0.13672  |         |
| N6A  |  | 4e | 1 |  | 0.82552  | 1.11967 | -0.00652 |         |
| N1B  |  | 4e | 1 |  | 0.08660  | 0.52546 | 0.12176  |         |
| H1BA |  | 4e | 1 |  | 0.08672  | 0.59764 | 0.13448  | -1.2000 |
| N2B  |  | 4e | 1 |  | -0.05028 | 0.45828 | 0.16811  |         |
| H2BA |  | 4e | 1 |  | -0.06731 | 0.53801 | 0.17087  | -1.2000 |
| N3B  |  | 4e | 1 |  | 0.03049  | 0.36319 | 0.04104  |         |
| N4B  |  | 4e | 1 |  | 0.30061  | 0.64553 | 0.13293  |         |
| N6B  |  | 4e | 1 |  | 0.02241  | 0.32556 | 0.25117  |         |
| O1A  |  | 4e | 1 |  | 0.94966  | 0.88159 | 0.23779  |         |
| O2A  |  | 4e | 1 |  | 1.00153  | 0.75957 | 0.18066  |         |
| O3A  |  | 4e | 1 |  | 1.24650  | 1.06905 | 0.07928  |         |
| O4A  |  | 4e | 1 |  | 1.30554  | 1.24859 | 0.11658  |         |
| O5A  |  | 4e | 1 |  | 0.90352  | 1.03705 | 0.15192  |         |
| O6A  |  | 4e | 1 |  | 0.70361  | 0.90424 | 0.17392  |         |
| O7A  |  | 4e | 1 |  | 0.79207  | 0.77220 | 0.12892  |         |
| O8A  |  | 4e | 1 |  | 0.89881  | 1.03853 | -0.01521 |         |
| O9A  |  | 4e | 1 |  | 0.81018  | 1.22927 | -0.02558 |         |
| O1B  |  | 4e | 1 |  | 0.02417  | 0.24157 | 0.03122  |         |
| O2B  |  | 4e | 1 |  | -0.04692 | 0.44203 | 0.04340  |         |
| O3B  |  | 4e | 1 |  | 0.23443  | 0.73322 | 0.14324  |         |
| O4B  |  | 4e | 1 |  | 0.38958  | 0.62710 | 0.15267  |         |
| O5B  |  | 4e | 1 |  | 0.04393  | 0.29862 | 0.12940  |         |
| O8B  |  | 4e | 1 |  | 0.10407  | 0.28349 | 0.23344  |         |
| O9B  |  | 4e | 1 |  | 0.02220  | 0.39360 | 0.28602  |         |
| N5B  |  | 4e | 1 |  | -0.26173 | 0.38868 | 0.12606  |         |
| O6B  |  | 4e | 1 |  | -0.29042 | 0.30686 | 0.09589  |         |
| O7B  |  | 4e | 1 |  | -0.25678 | 0.50883 | 0.12269  |         |

**Table 3. Some hydrogen bonding parameters of ZXC-19**

| Donor---Hydrogen... Acceptor | Don---Hyd [Å] | Hyd---Acc [Å] | Don---Acc [Å] | D---H-----A |
|------------------------------|---------------|---------------|---------------|-------------|
| N1B---H1BA... O2A»4          | 0.79          | 2.35          | 3.067         | 150.4°      |
| N2B---H2BA... O2A»4          | 0.81          | 2.33          | 3.018         | 143.9°      |

## SUPPORTING INFORMATION

|                        |      |      |       |        |
|------------------------|------|------|-------|--------|
| N1B»1---H1BA»1...O2A»5 | 0.79 | 2.35 | 3.067 | 150.4° |
| N2B»1---H2BA»1...O2A»5 | 0.81 | 2.33 | 3.018 | 143.9° |
| N1B»2---H1BA»2...O2A»6 | 0.79 | 2.35 | 3.067 | 150.4° |
| N2B»2---H2BA»2...O2A»6 | 0.81 | 2.33 | 3.018 | 143.9° |
| N1B»3---H1BA»3...O2A»7 | 0.79 | 2.35 | 3.067 | 150.4° |

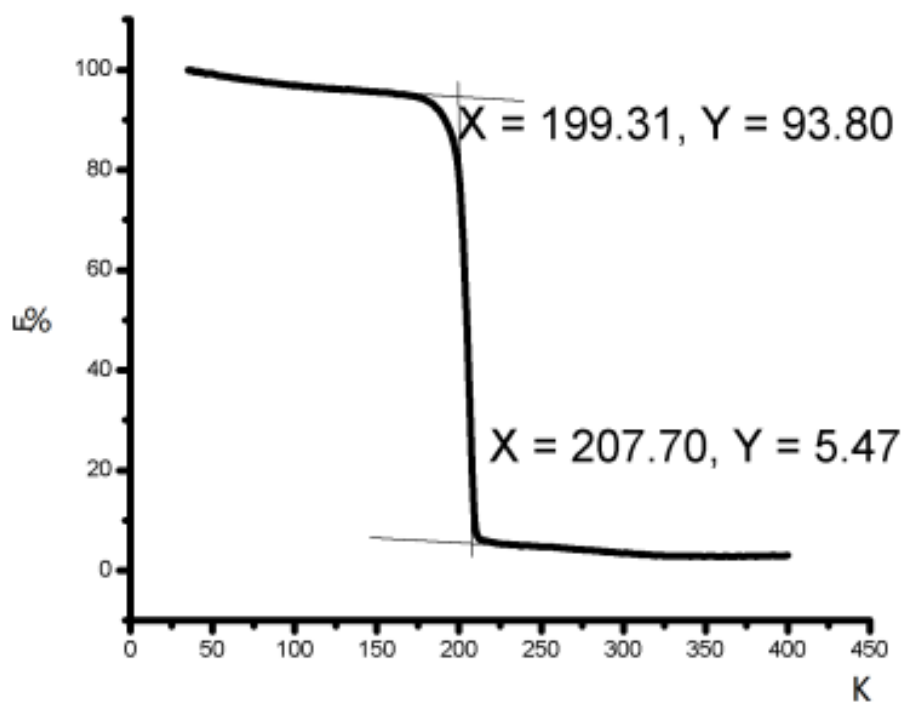

Figure 4 The TG curve diagram of ZXC-19

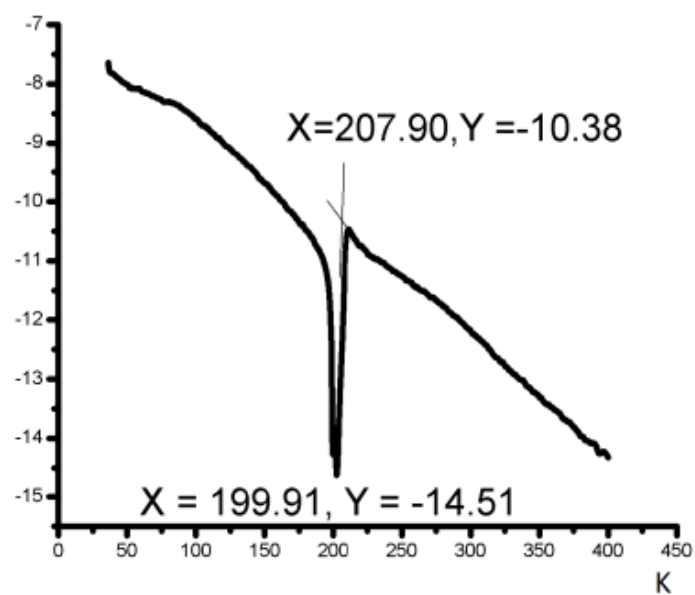

Figure 5 The DSC curve diagram of ZXC-19

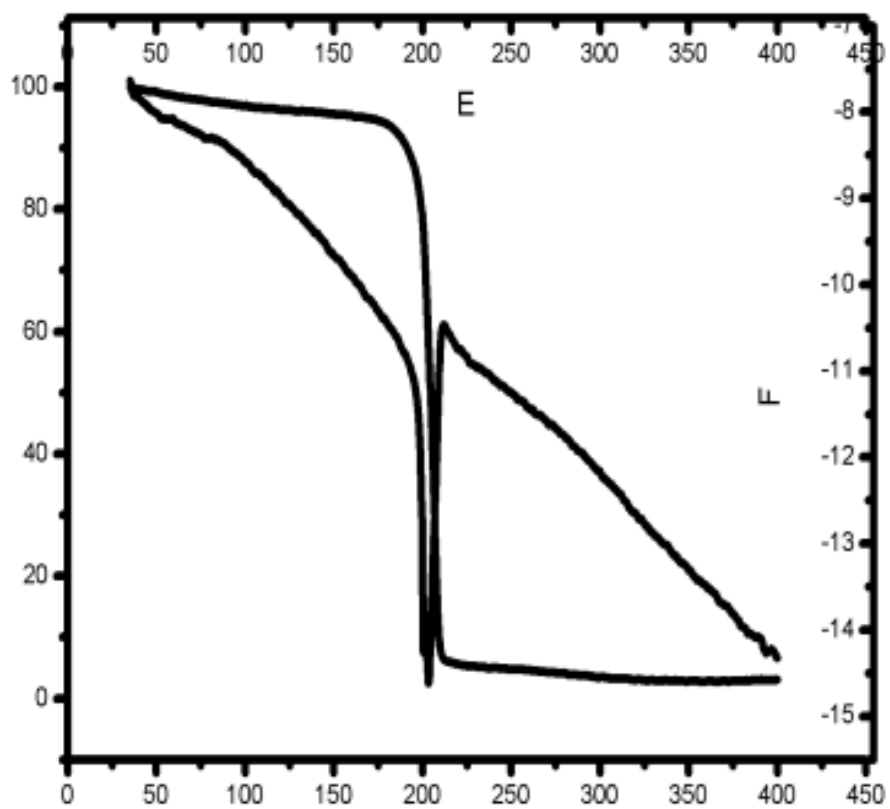

Figure 6 The TG-DSC curve diagram of ZXC-19

# SUPPORTING INFORMATION

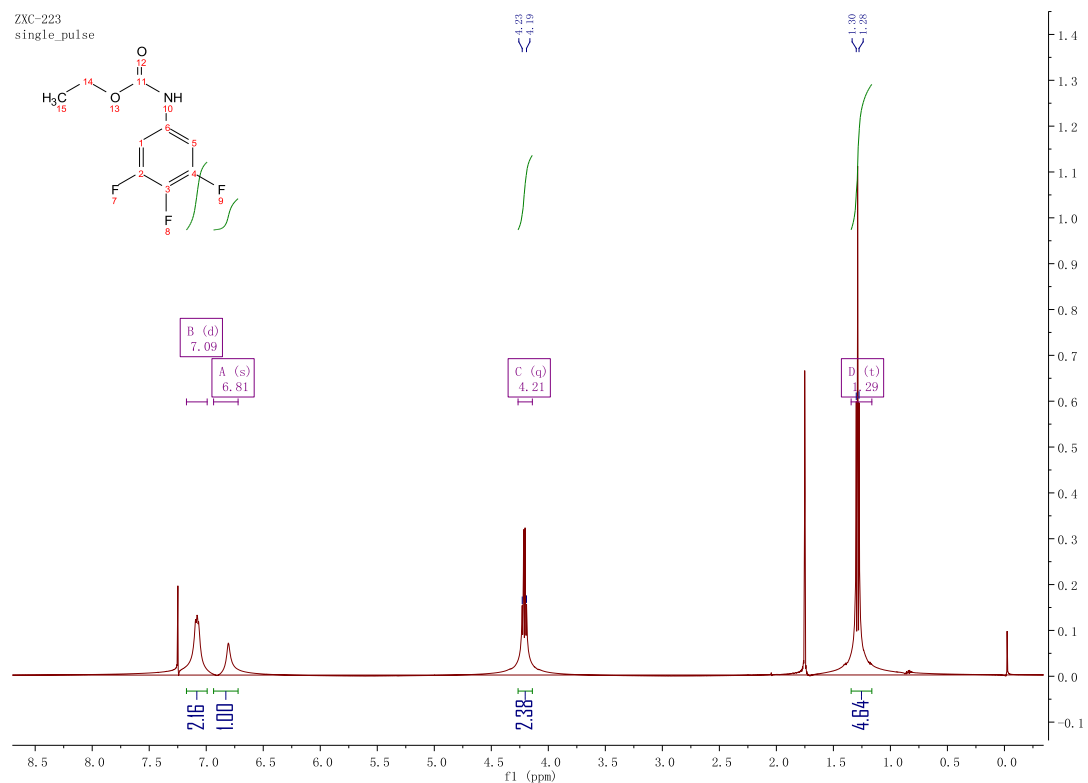

Figure 7  $^1\text{H}$  NMR spectrum (600 MHz) of ethyl (3,4,5-trifluorophenyl)carbamate in  $\text{CDCl}_3\text{-d}_1$  at  $25^\circ\text{C}$

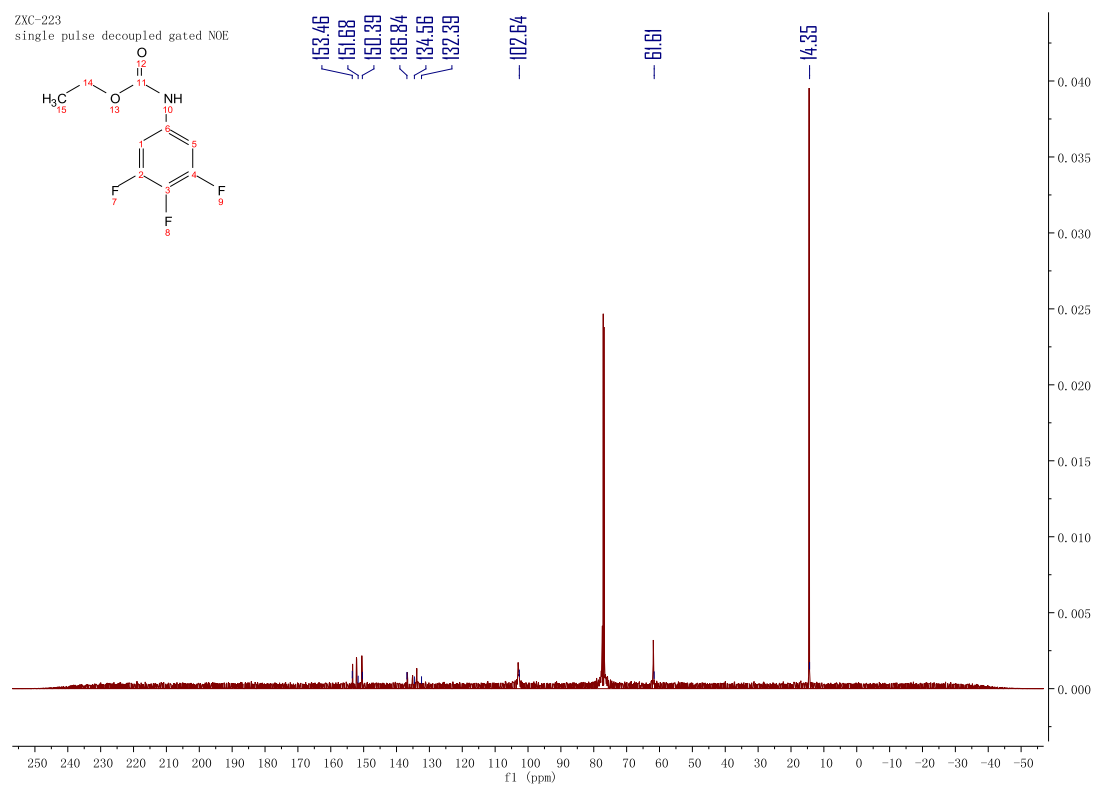

Figure 8  $^{13}\text{C}$  NMR spectrum (125 MHz) of ethyl (3,4,5-trifluorophenyl)carbamate in  $\text{CDCl}_3\text{-d}_1$  at  $25^\circ\text{C}$



# SUPPORTING INFORMATION

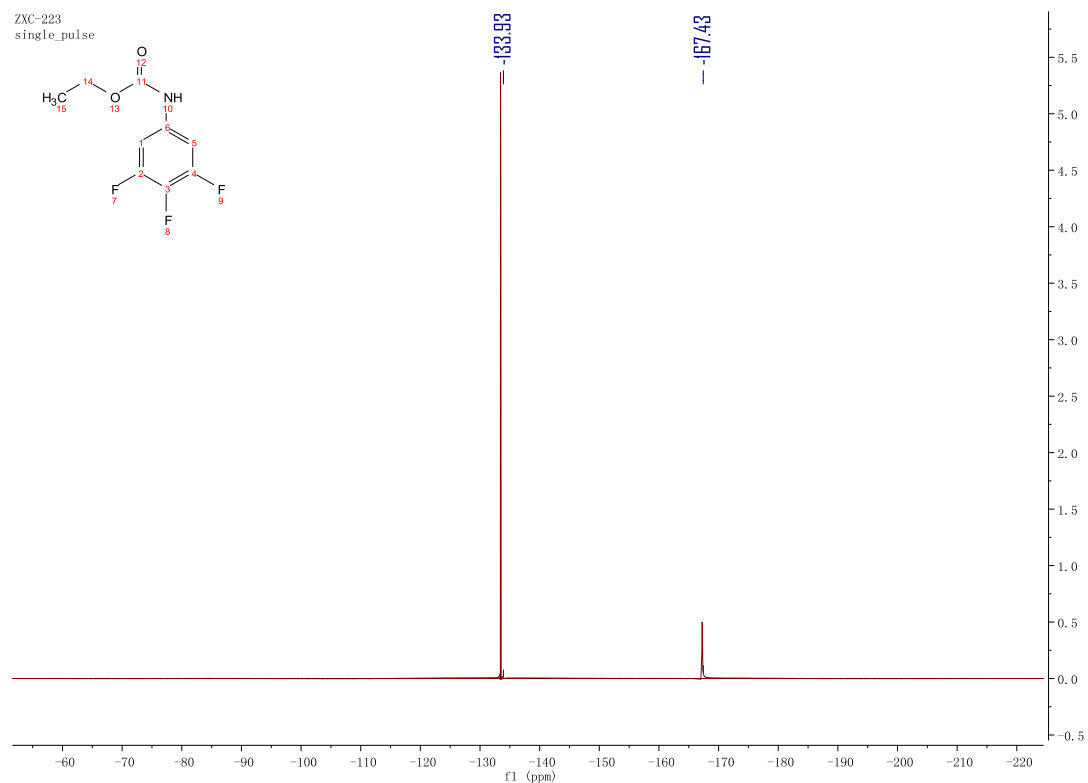

Figure 9  $^{19}\text{F}$  NMR spectrum (564 MHz) of ethyl (3,4,5-trifluorophenyl)carbamate in  $\text{CDCl}_3\text{-d}_1$  at  $25^\circ\text{C}$

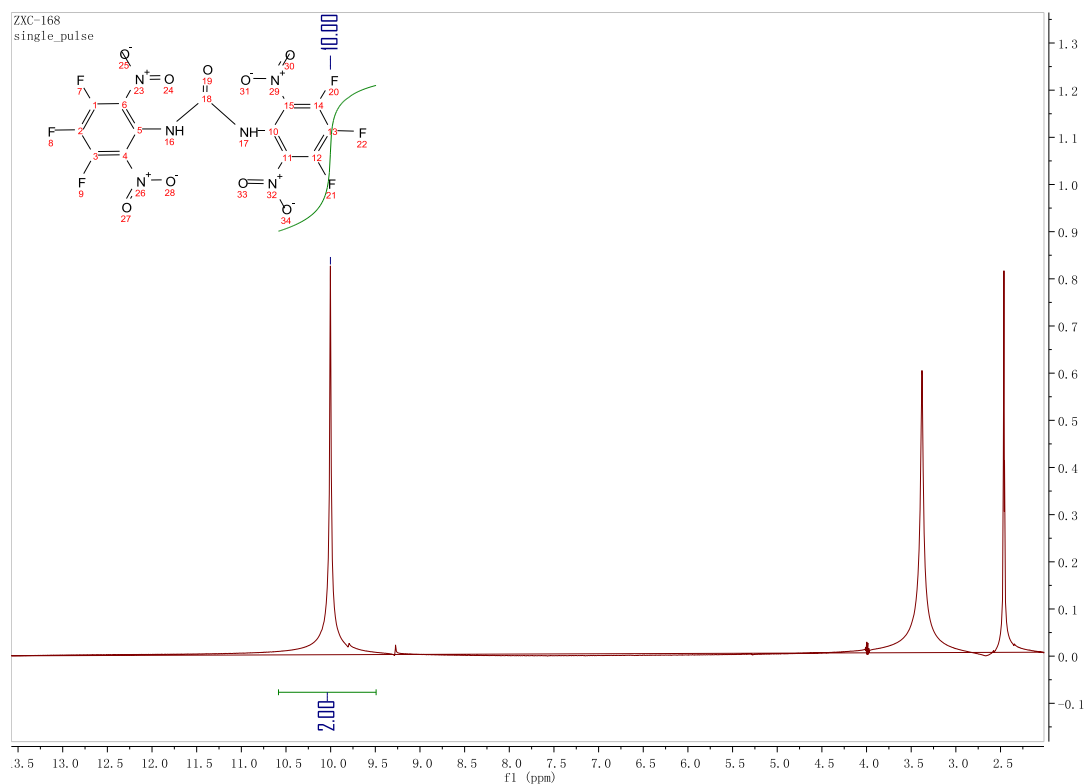

Figure 10  $^1\text{H}$  NMR spectrum (600 MHz) of 1,3-bis(3,4,5-trifluoro-2,6-dinitrophenyl)urea in  $\text{DMSO-d}_6$  at  $25^\circ\text{C}$

# SUPPORTING INFORMATION

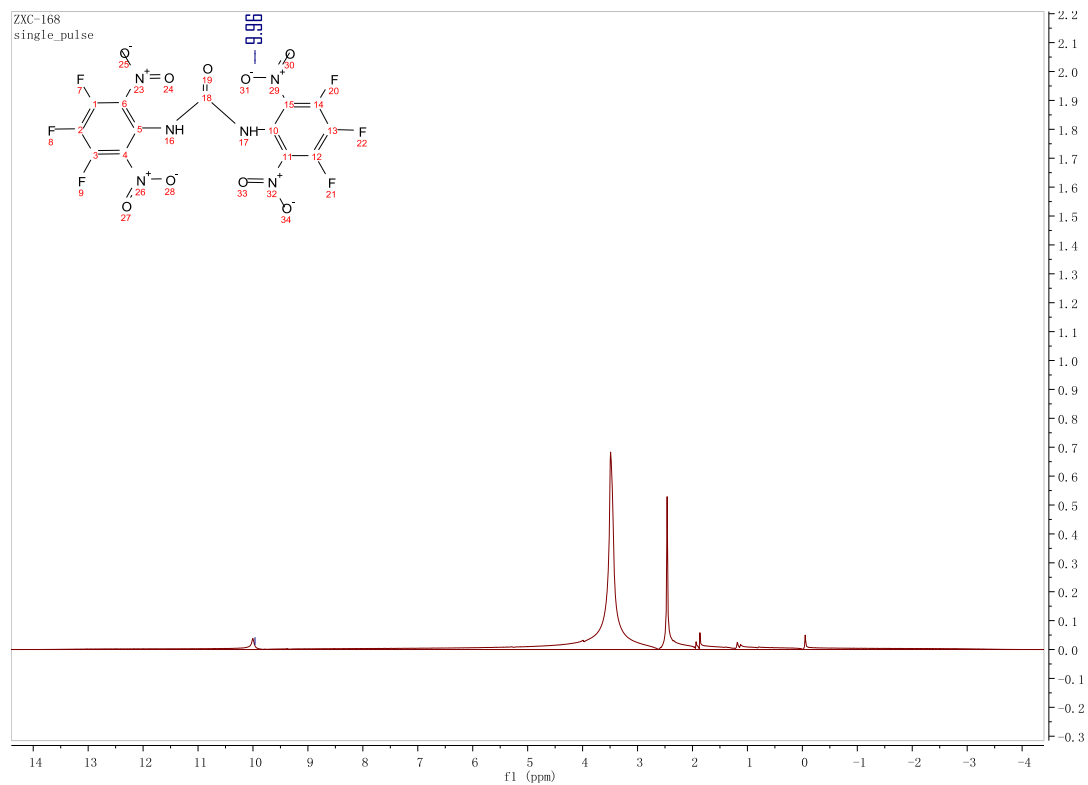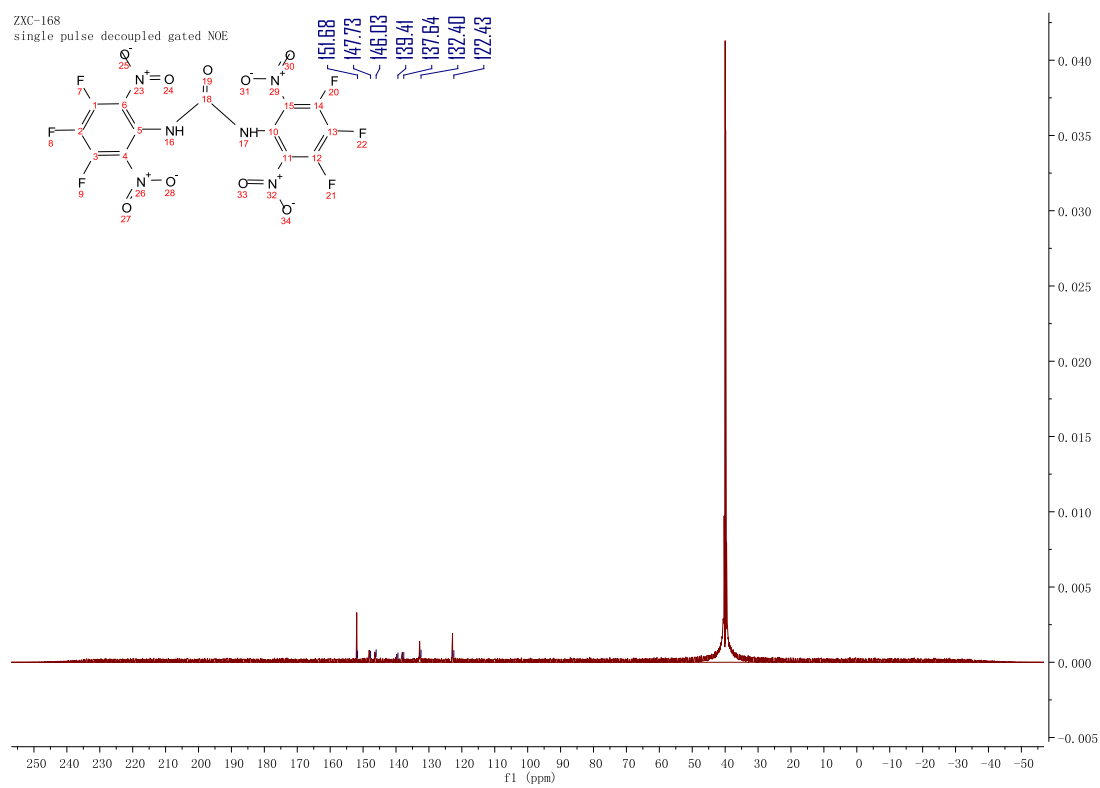

# SUPPORTING INFORMATION

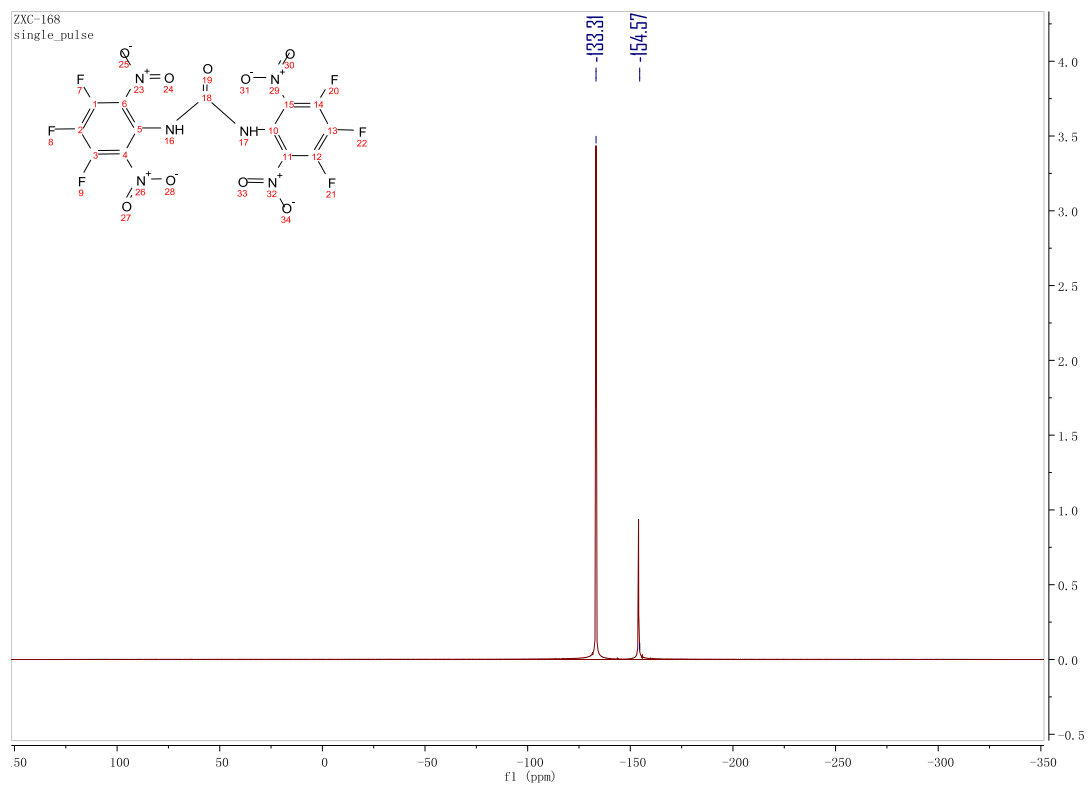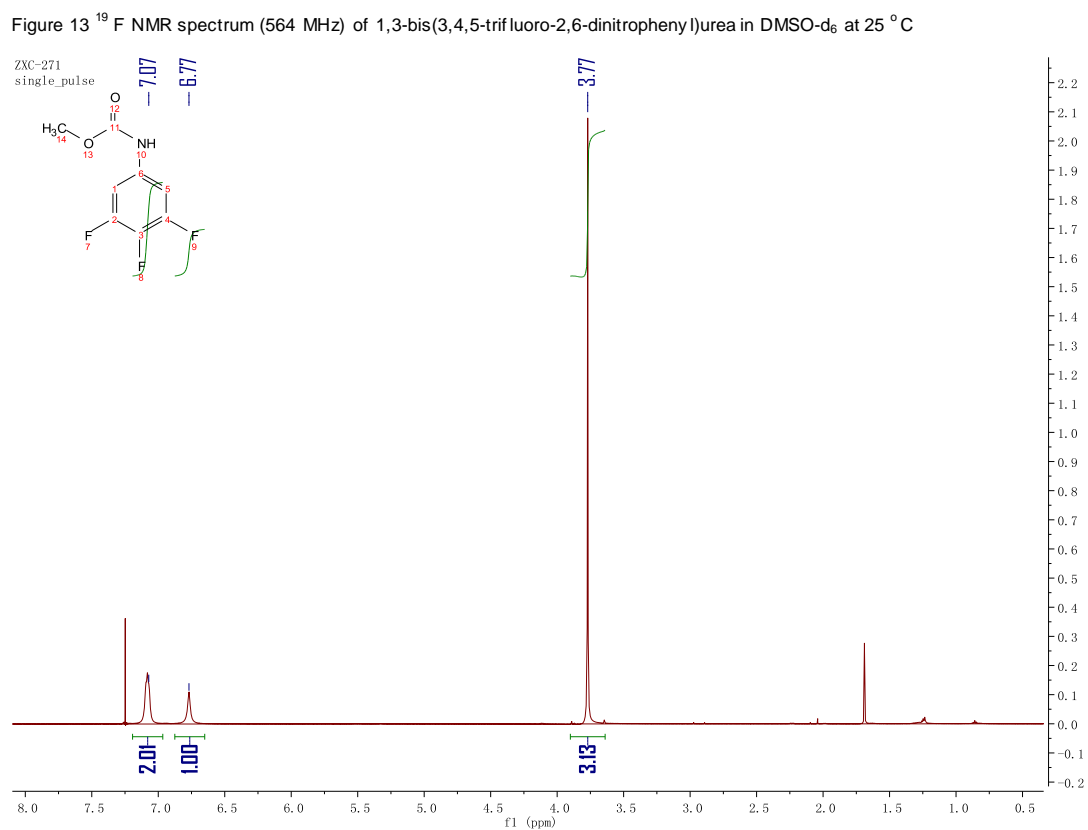

# SUPPORTING INFORMATION

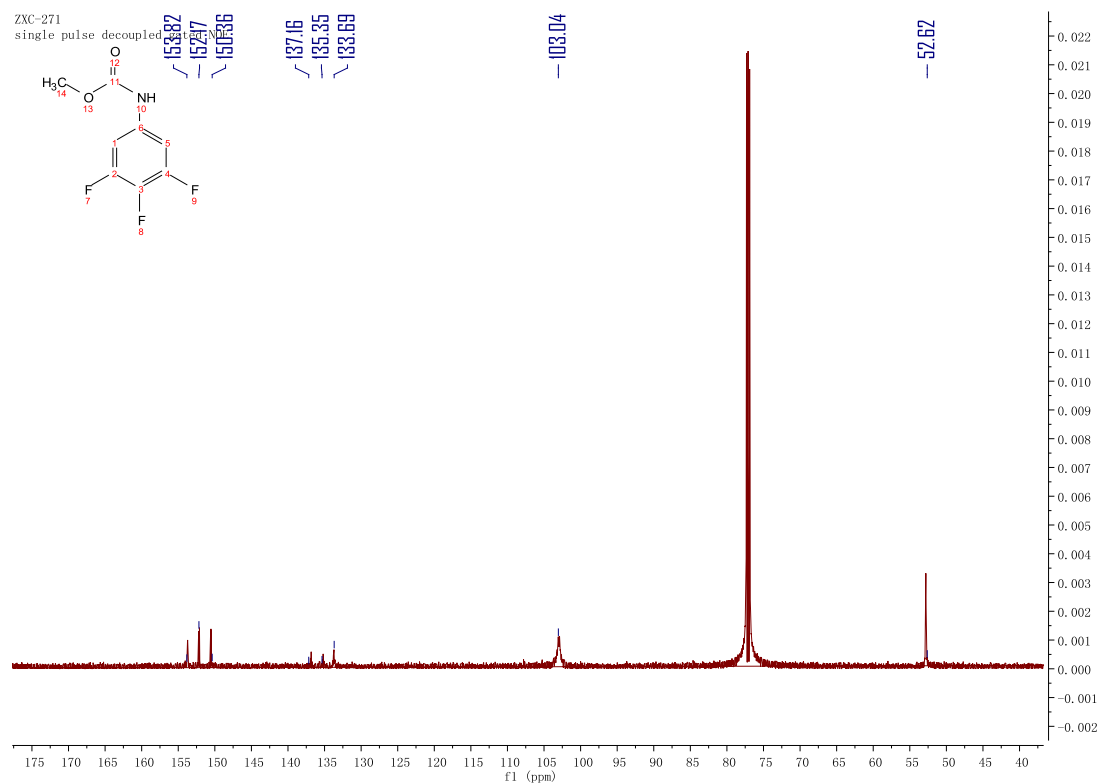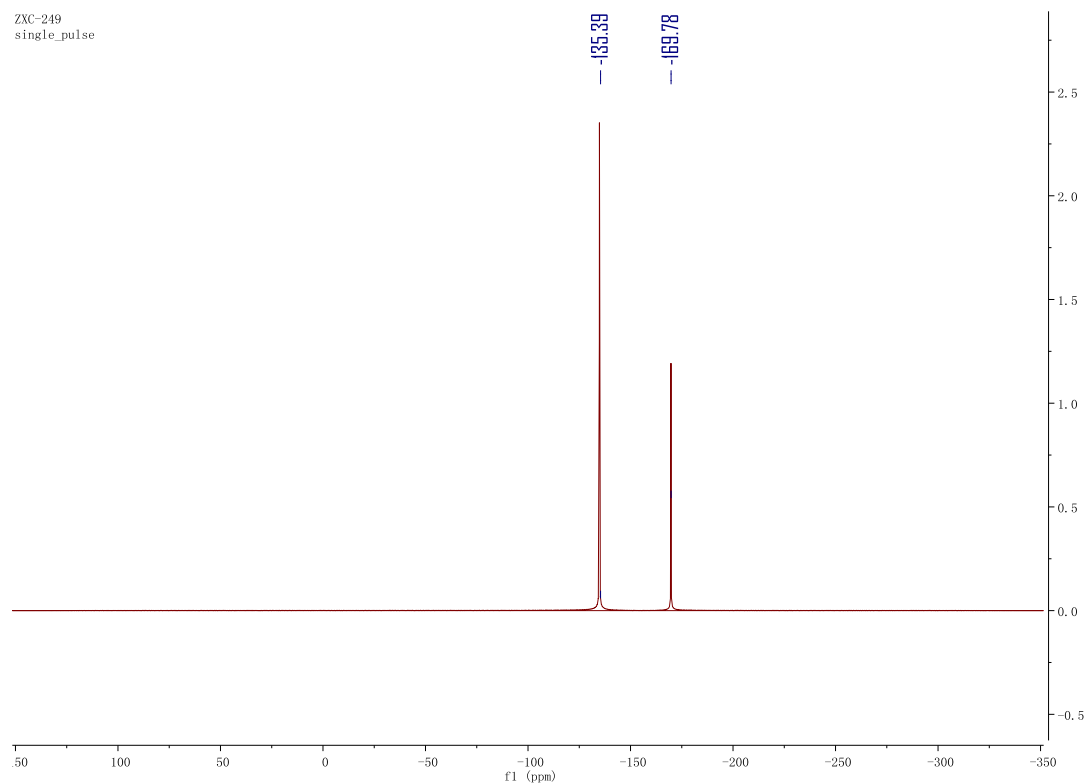

# SUPPORTING INFORMATION

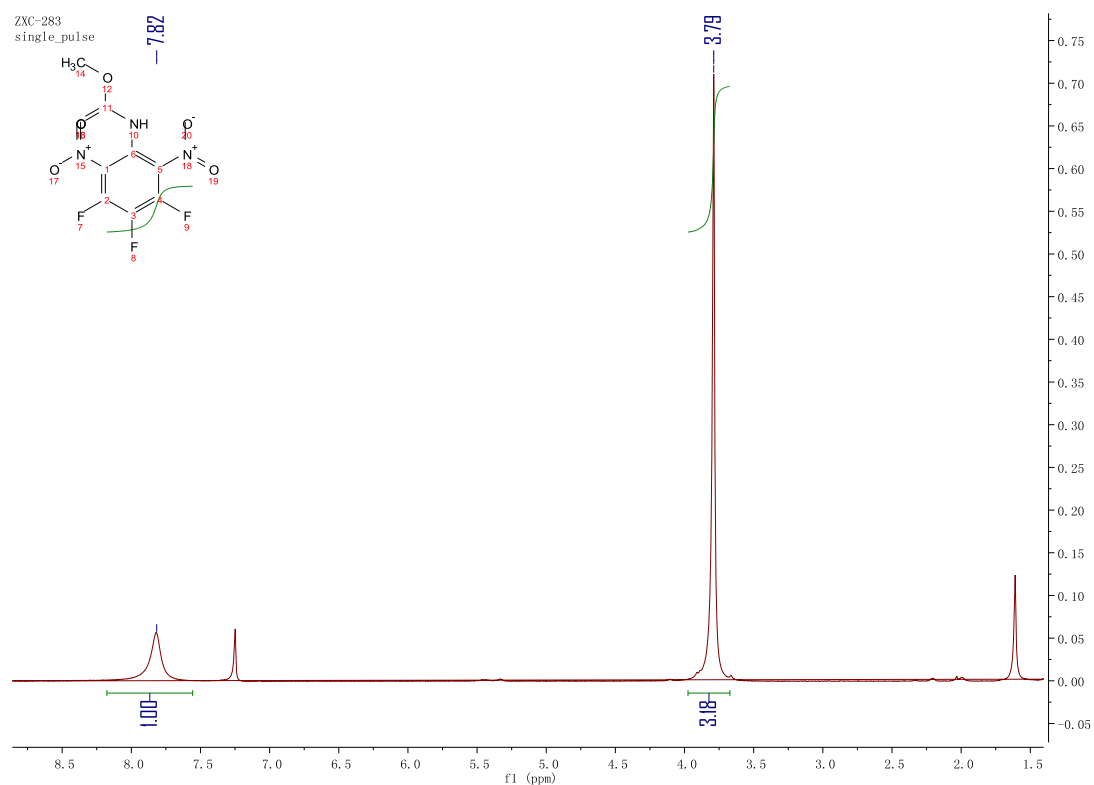

Figure 17 <sup>1</sup>H NMR spectrum (600 MHz) of methyl (3,4,5-trifluoro-2,6-dinitrophenyl)carbamate in CDCl<sub>3</sub>-d<sub>1</sub> at 25 °C

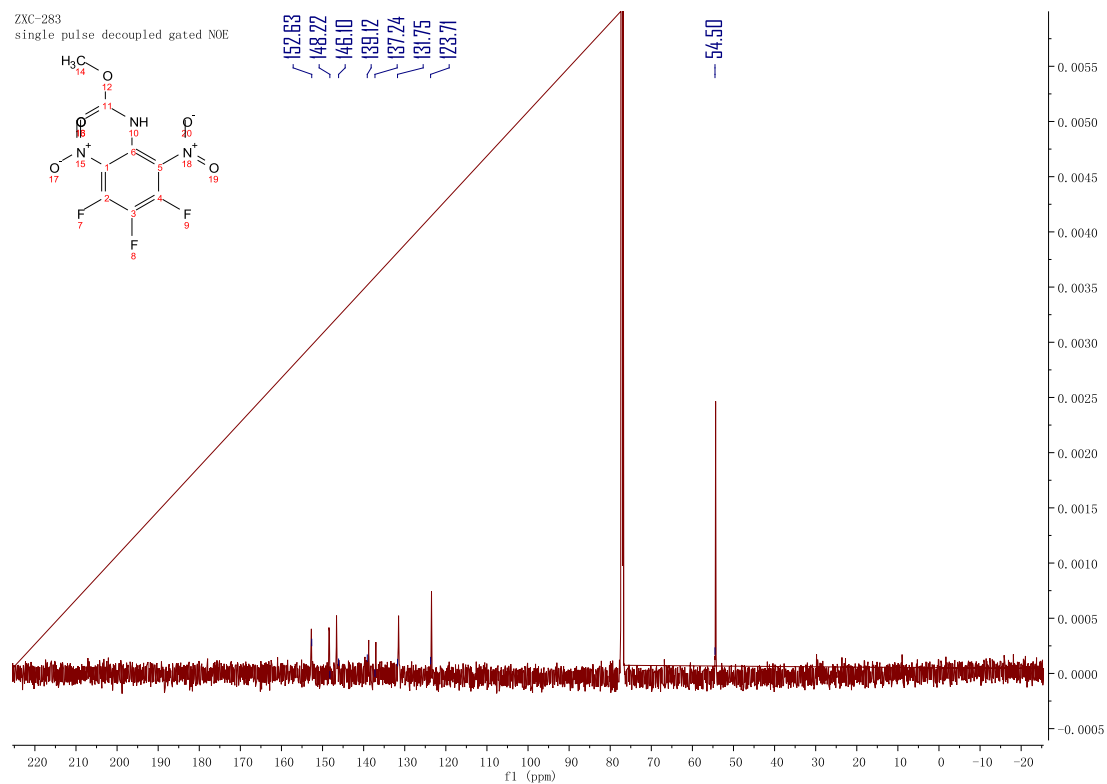

Figure 18 <sup>13</sup>C NMR spectrum (125 MHz) of methyl (3,4,5-trifluoro-2,6-dinitrophenyl)carbamate in CDCl<sub>3</sub>-d<sub>1</sub> at 25 °C

# SUPPORTING INFORMATION

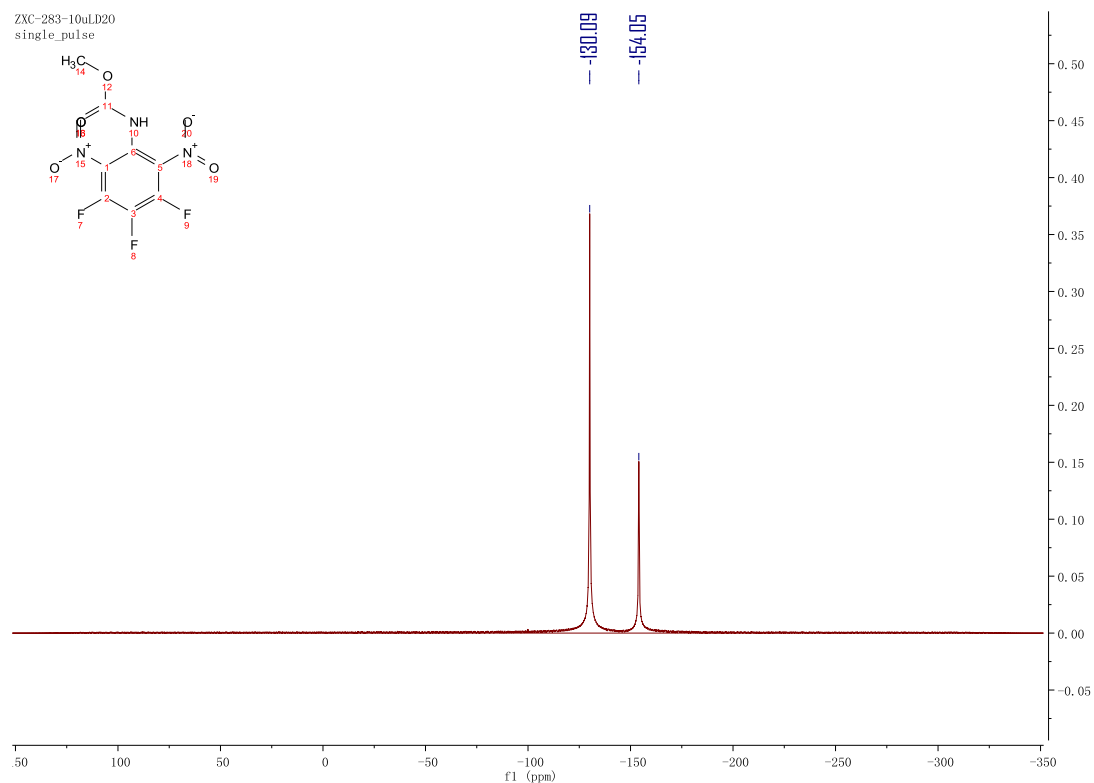

Figure 19  $^{19}\text{F}$  NMR spectrum (564 MHz) of methyl (3,4,5-trifluoro-2,6-dinitrophenyl)carbamate in  $\text{CDCl}_3\text{-d}_1$  at  $25^\circ\text{C}$

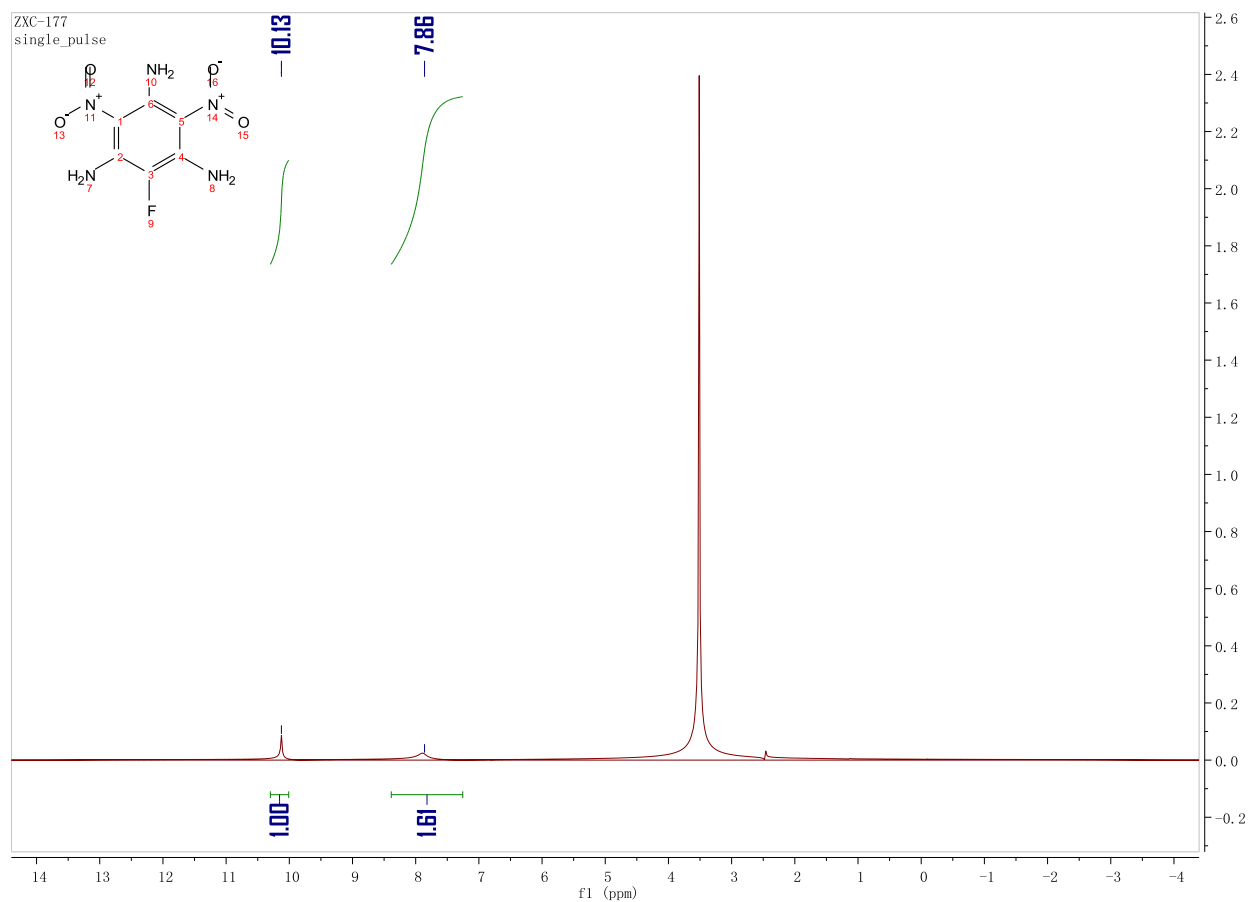

Figure 20  $^1\text{H}$  NMR spectrum (600 MHz) of ZXC-8 in  $\text{DMSO-d}_6$  at  $25^\circ\text{C}$

## SUPPORTING INFORMATION

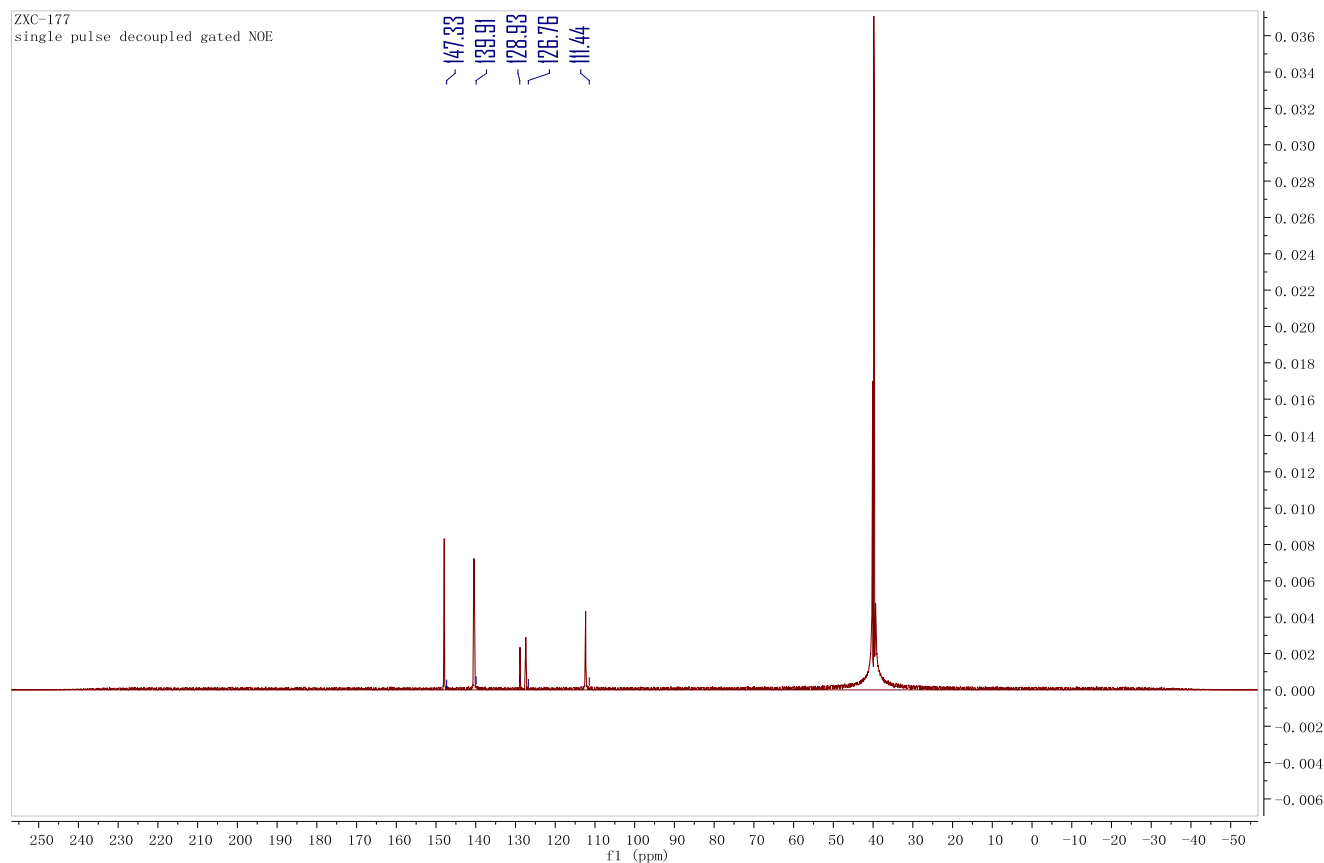

Figure 21  $^{13}\text{C}$  NMR spectrum (150 MHz) of ZXC-8 in  $\text{DMSO-d}_6$  at 25 °C

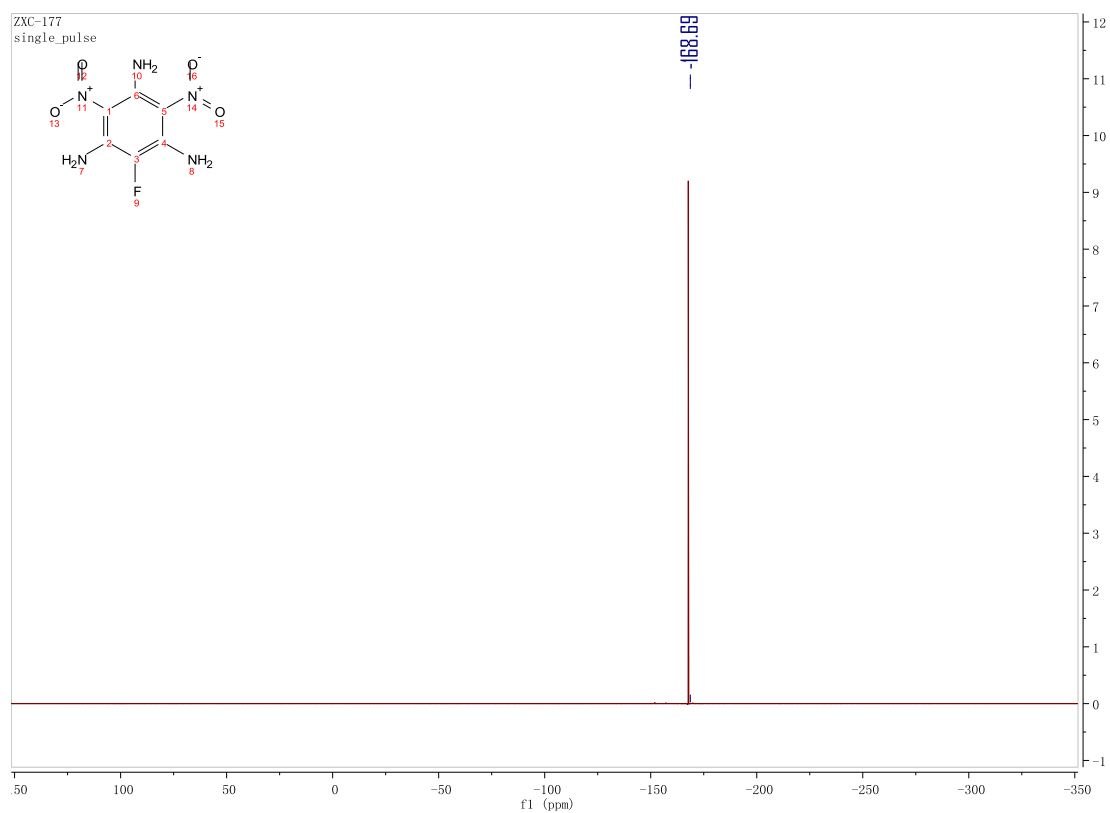

Figure 22  $^{19}\text{F}$  NMR spectrum (564 MHz) of ZXC-8 in  $\text{DMSO-d}_6$  at 25 °C

## SUPPORTING INFORMATION

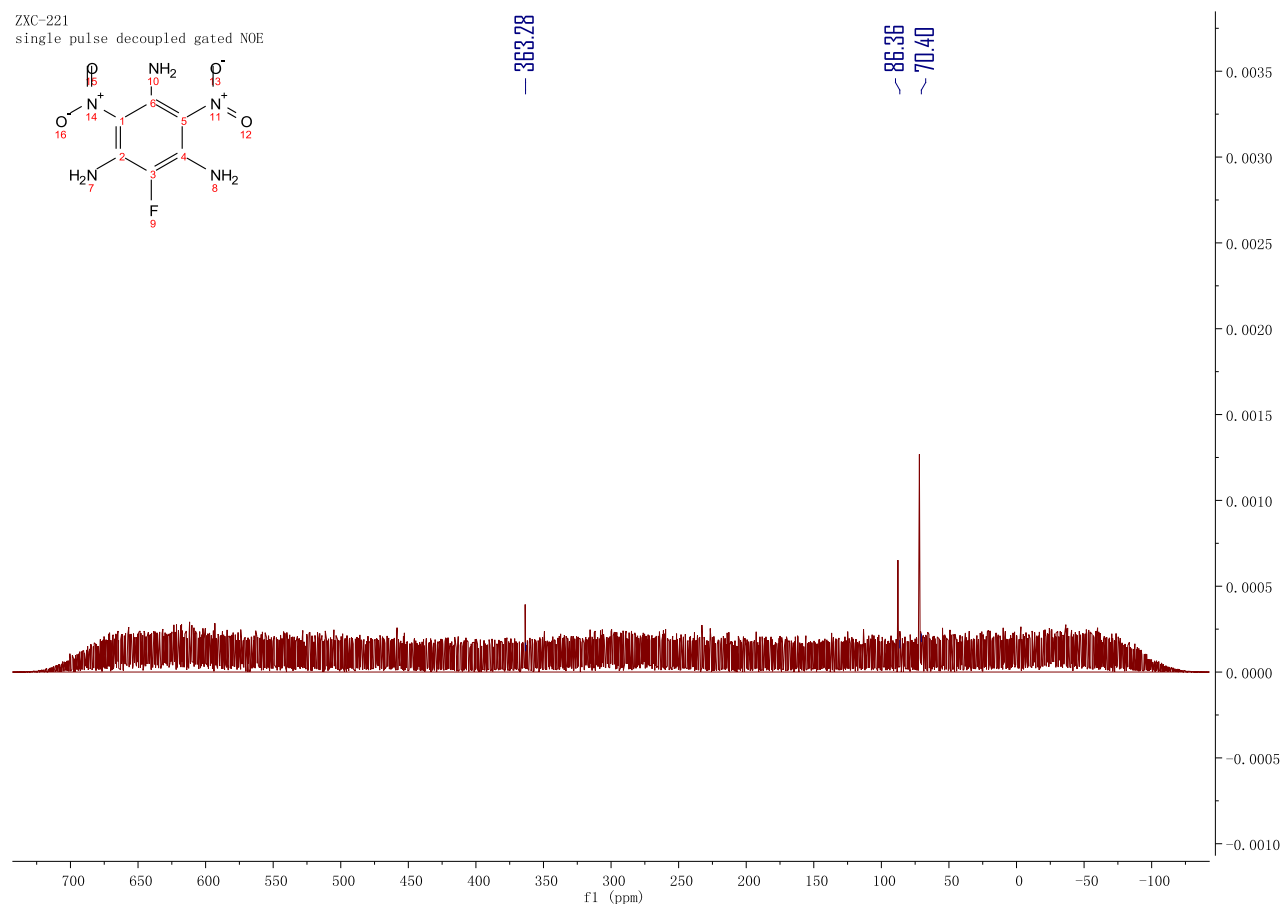

Figure 23  $^{15}\text{N}$  NMR spectrum (60.81 MHz) of ZXC-8 in  $\text{DMSO-d}_6$  at  $25^\circ\text{C}$

### Computation details

The predictions of heats of formation (HOF) adopt the hybrid DFT-B3LYP methods with 6-311+G\*\* basis set via designed isodesmic reactions. The isodesmic reaction processes, i.e., the number of each kind of formal bond is conserved, are used with application of the bond separation reaction (BSR) rules. The molecule is broken down into a set of two heavy-atom molecules containing the same component bonds. The isodesmic reactions used to derive the HOF of the title compounds are in Scheme 1. The change of enthalpy for the reactions at 298 K can be expressed as

$$\Delta H_{298} = \sum \Delta_f H_P - \sum \Delta_f H_R \quad (1)$$

Where  $\Delta_f H_R$  and  $\Delta_f H_P$  are the HOF of reactants and products at 298 K, respectively, and  $\Delta H_{298}$  can be calculated using the following expression:

$$\Delta H_{298} = \Delta E_{298} + \Delta(PV) = \Delta E_0 + \Delta ZPE + \Delta H_T + \Delta nRT \quad (2)$$

where  $\Delta E_0$  is the change in total energy between the products and the reactants at 0 K;  $\Delta ZPE$



## SUPPORTING INFORMATION

is the difference between the zero-point energies (ZPE) of the products and the reactants at 0 K;  $\Delta H_T$  is thermal correction from 0 to 298 K. The  $\Delta(PV)$  value in eq (2) is the  $PV$  work term. It equals  $\Delta nRT$  for the reactions of ideal gas. For the isodesmic reactions,  $\Delta n = 0$ , so  $\Delta(PV) = 0$ . On the left side of Eq. (1), apart from target compound, all the others are called reference compounds. The HOFs of reference compounds are available from the experiments.

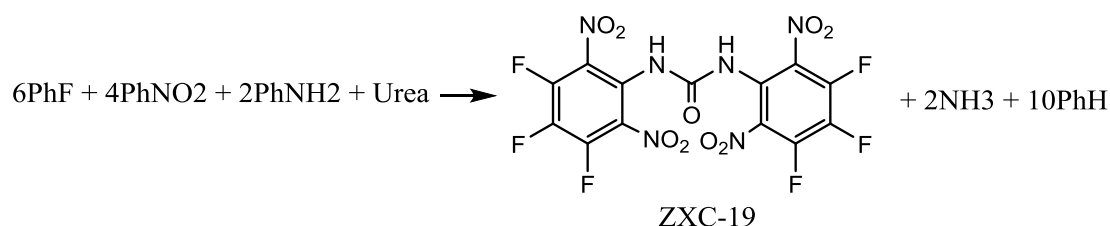

Figure 14. Isodesmic reactions for ZXC-19

Detonation velocity (D) and detonation pressure (P) were evaluated by the empirical Kamlet formula

as

$$P = 1.558 \rho^2 \Phi \quad (1)$$

$$D = 1.01 \Phi^{1/2} (1 + 1.30\rho_0) \quad (2)$$

$$\Phi = 0.4889 N (MQ)^{1/2} \quad (3)$$

where D is the predicted detonation velocity (km/s) and P is the detonation pressure (GPa),  $\rho$  is the density of a compound ( $\text{cm}^3/\text{mol}$ ).  $\Phi$ , N, M and Q are characteristic parameters of an explosive, Q is chemical energy of detonation (kJ/g). The crystal densities and the calculated heats of formation were used in computing the D and P values.

**Table 4 Total energy at B3LYP/6-311+G\*\* level, vibrational zero-point energy, thermal correction to enthalpy and heat of formation for title compounds and reference compounds<sup>a</sup>**

| Species           | $E$          | ZPE    | $\Delta H_T$ | HOF                  |
|-------------------|--------------|--------|--------------|----------------------|
| ZXC-19            | -2101.293637 | 484.21 | 562.19       | -891.65              |
| PhNH <sub>2</sub> | -287.6876277 | 306.16 | 323.98       | 87.50 <sup>b</sup>   |
| PhF               | -331.5801118 | 241.3  | 257.32       | -115.90 <sup>b</sup> |
| Benzene           | -232.3112363 | 262.92 | 276.95       | 82.9 <sup>b</sup>    |
| Nitrobenzene      | -436.8746216 | 269.3  | 289.78       | 68.5 <sup>b</sup>    |
| Urea              | -225.3498071 | 166.76 | 180.91       | -245.8 <sup>b</sup>  |
| NH <sub>3</sub>   | -56.5826356  | 89.89  | 99.9         | -45.9 <sup>b</sup>   |

<sup>a</sup> E in a.u., ZPE,  $\Delta H_T$  and HOF are in kJ/mol. <sup>b</sup> Data from Ref [Dean, J. A. *LANGE'S Handbook of Chemistry*, 15th ed., McGraw-Hill Book Co, New York, 1999].

**Table 5 The detonation properties of of ZXC- 19**

|        | $T_d^a$ (°C) | $\Delta H$ (J/g) | $d^b$ (g cm <sup>-3</sup> ) | $\Delta H^c$ (kJ mol <sup>-1</sup> ) | $P^d$ (GPa) | $D^e$ (m s <sup>-1</sup> ) | $IS^f$ (J) | $FS^g$ (N) |
|--------|--------------|------------------|-----------------------------|--------------------------------------|-------------|----------------------------|------------|------------|
| ZXC-19 | 207.9        | 4916.86          | 1.90                        | 292.30                               | 32.54       | 8260                       | 24.5       | 360        |
| TATB   | 375.0        | -                | 1.93                        | 21.74                                | 27.88       | 7880                       | >60        | 360        |

## SUPPORTING INFORMATION

|                                                                                                                                                                                                                                                        |       |   |      |       |       |      |   |     |
|--------------------------------------------------------------------------------------------------------------------------------------------------------------------------------------------------------------------------------------------------------|-------|---|------|-------|-------|------|---|-----|
| RDX                                                                                                                                                                                                                                                    | 210.0 | - | 1.81 | 86.30 | 38.00 | 8983 | 7 | 120 |
| <sup>a</sup> Decomposition temperature; <sup>b</sup> Density based on XRD at 298K; <sup>c</sup> Formation heat; <sup>d</sup> Detonation pressure; <sup>e</sup> Detonation velocity; <sup>f</sup> Impact sensitivity; <sup>g</sup> Friction sensitivity |       |   |      |       |       |      |   |     |

**Note:**  $V_D$  is the predicted detonation velocity (km/s);  $P$  is the detonation pressure (GPa);  $d$  is measured density ( $\text{cm}^3/\text{mol}$ );  $\Delta H_T$  is the thermal correction to enthalpy (kJ/mol);  $IS$  is impact sensitivity (BAM drophammer, 1 of 6);  $FS$  is friction sensitivity (BAM friction tester, 1 of 6);

### Reference

- 1 a) A. D. Becke, J. Phys. Chem. 1993, 98, 5648-5652; b) P. J. Stephens, F. J. Devlin, C. F. Chabalowski, M. J. Frisch, J. Phys. Chem. 1994, 98, 11623-11627.
- 2 P. C. Hariharan, J. A. Pople, Theoretica Chimica Acta. 1973, 28, 213-222.
- 3 a) M. W. Schmidt, M. S. Gordon, J. A. Boatz, J. Phys. Chem. A 2005, 109, 7285-7295; b) H. Gao, C. Ye, C. M. Piekarski, J. M. Shreeve, J. Phys. Chem. C 2007, 111, 10718-10731.
- 4 M. Jaidann, S. Roy, H. Abou-Rachid, L. S. Lussier, J. Hazard Mater. 2010, 176, 165-173.
- 5 J. A. Pople, J. S. Binkley, R. Seeger, Int. J. Quantum Chem. 1976, 10, 1-19.
- 6 a) X. J. Xu, H. M. Xiao, X. H. Ju, X. D. Gong, W. H. Zhu, J. Phys. Chem. A 2006, 110, 5929-5933; b) G. X. Wang, X. D. Gong, Y. Liu, H. Du, X. Xu, H. M. Xiao, J. Hazard Mater. 2010, 177, 703-710.
